# Supplementary material
Source: PubMed Central journal article supplement (PMC341852)

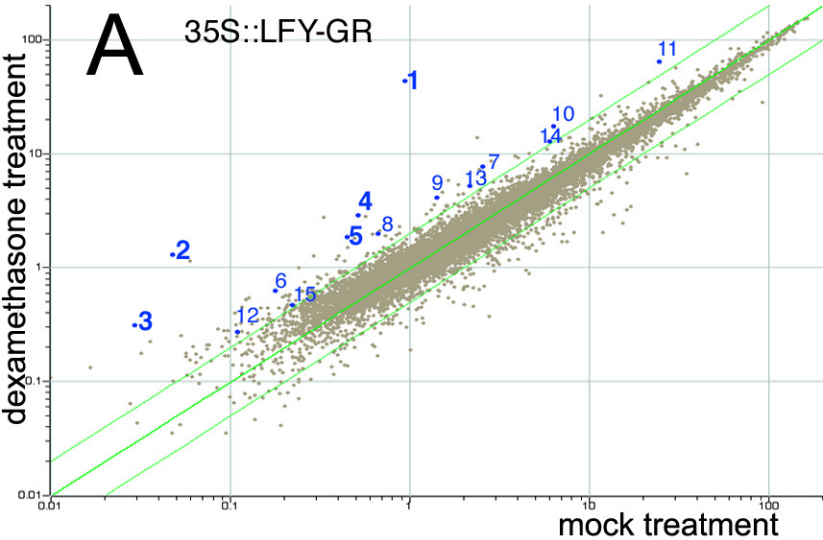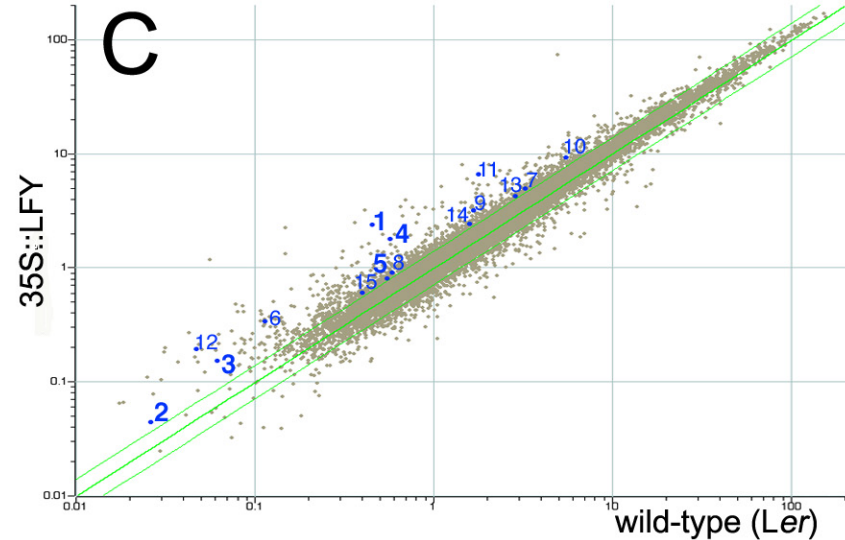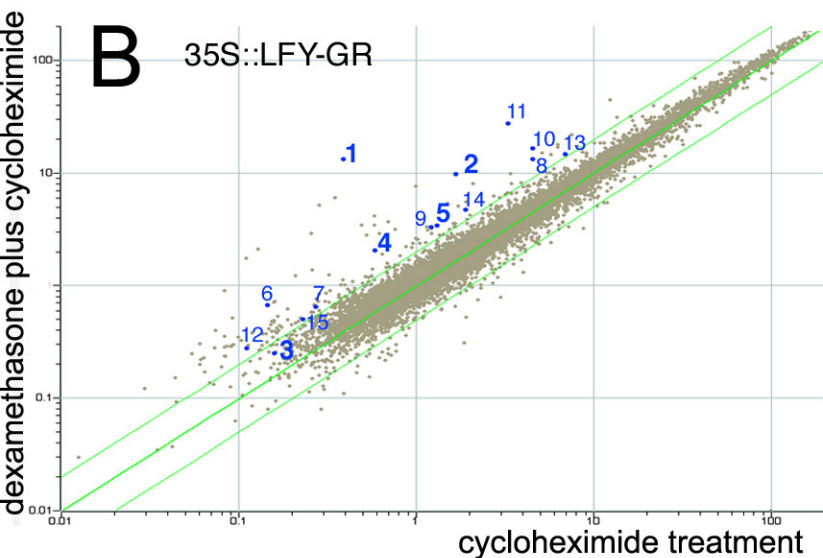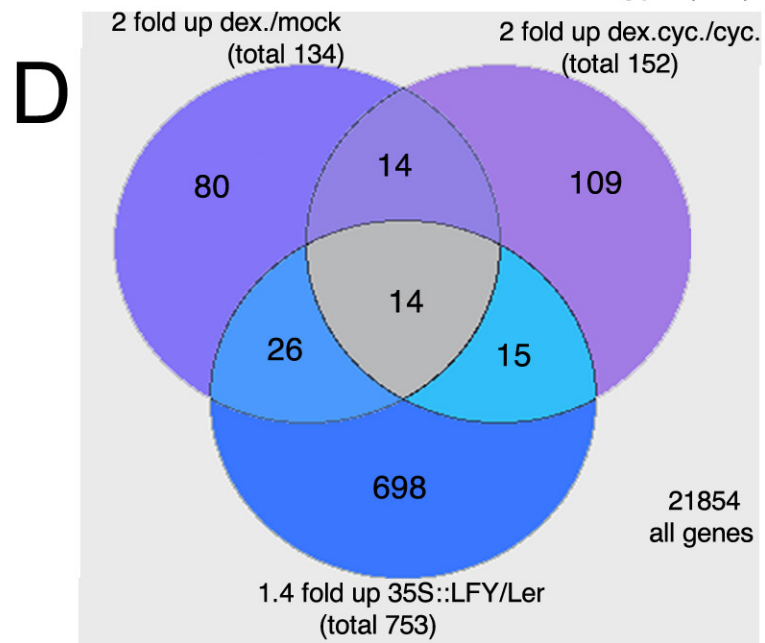

Supplement: pnas_0307842100_3.pdf [file pnas_0307842100_3.pdf]

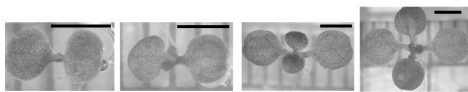

6

8

10

12

days

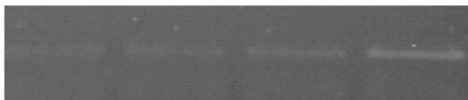*AP1*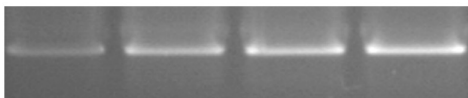*CAL*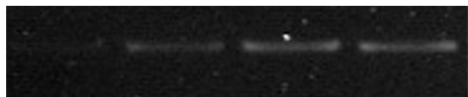*At1g16070*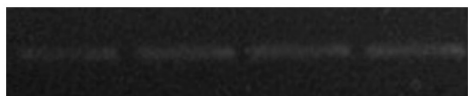*At3g61250*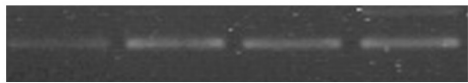*At5g03790*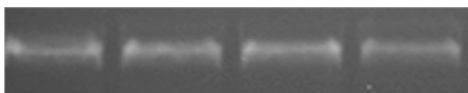*At5g49770*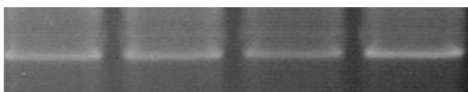*At5g60630*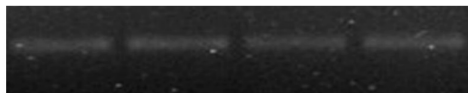*EIF4*

Supplement: pnas_0307842100_5.pdf [file pnas_0307842100_5.pdf]
